# Supplementary material
Source: Royal Society of Chemistry journal article supplement (doi:10.1039/d6cp01293k)
Supplement: d6cp01293k5.pdf [file d6cp01293k5.pdf]

Supporting information for

**Weak interactions in mixed symmetric and asymmetric self-assembled monolayers  
for perovskite solar cells: a classical molecular dynamic view**

Jun Tang,<sup>1</sup> Hehuan Bai,<sup>1</sup> Xiaoding Zhang,<sup>2</sup> Jiayi Zhang,<sup>1</sup> Jinge Han,<sup>1</sup> Zhigang Zang,<sup>1</sup> Ru Li<sup>1,\*</sup>

<sup>1</sup>Key Laboratory of Optoelectronic Technology and Systems (Ministry of Education),  
College of Optoelectronic Engineering, Chongqing University, Chongqing 400044, China

<sup>2</sup>National Key Laboratory of Shock Wave and Detonation Physics, China Academy of  
Engineering Physics, Mianyang 621022, China

\*Corresponding authors.

E-mail addresses: [ru.li@cqu.edu.cn](mailto:ru.li@cqu.edu.cn) (Ru Li)

This file includes: S1-S8

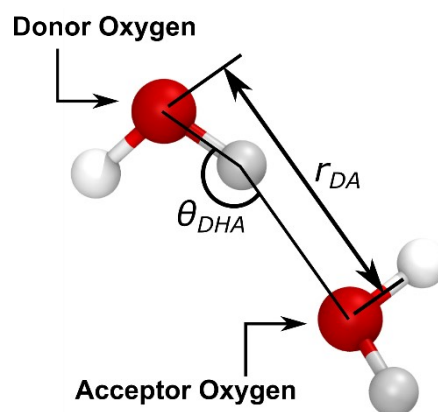

Fig. S1. The schematic diagram of hydrogen bond

### $\pi$ -Stacking Configuration

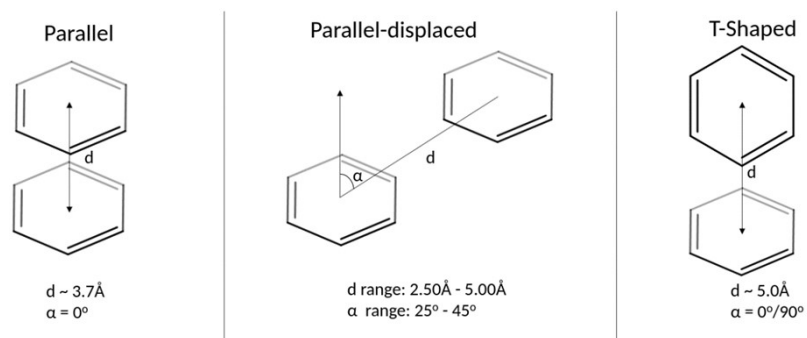

Fig. S2. The  $\pi$ - $\pi$  interaction used in our analysis

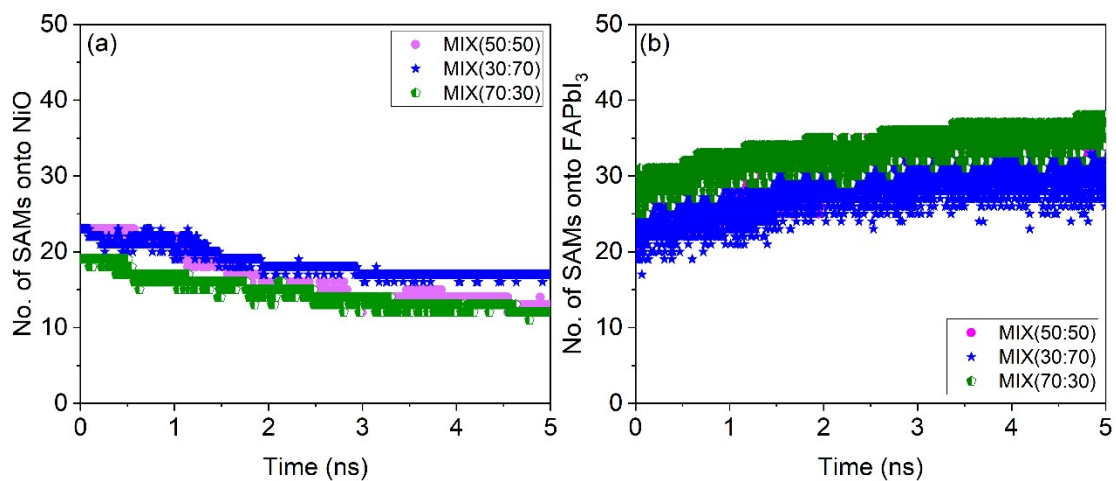

Fig. S3. The number of SAMs assigned to NiO and FAPbI<sub>3</sub> with different mix ratio

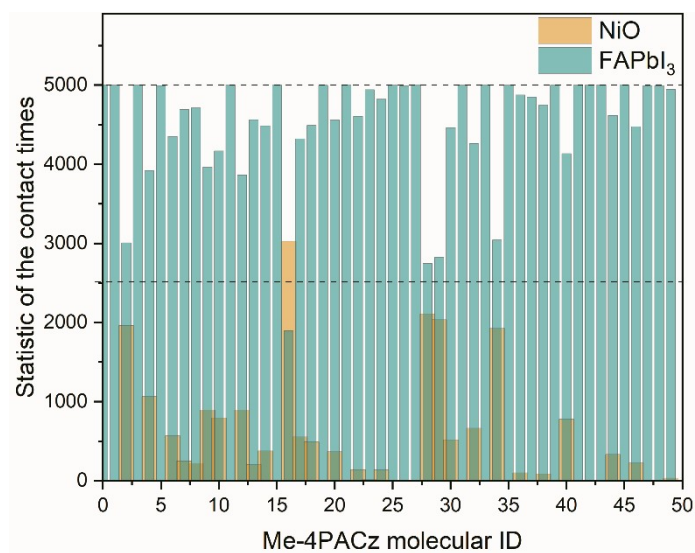

Fig. S4. The statistic of the contact times between Me-4PACz and NiO, FAPbI<sub>3</sub>

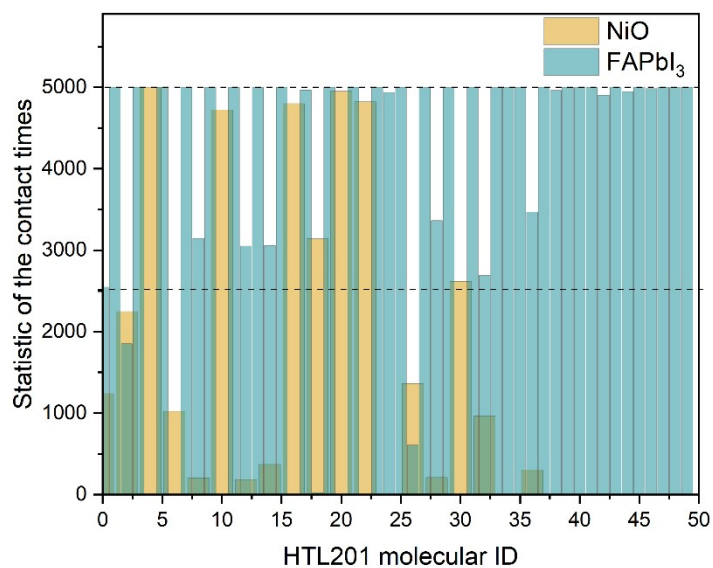

Fig. S5. The statistic of the contact times between HTL201 and NiO, FAPbI<sub>3</sub>.

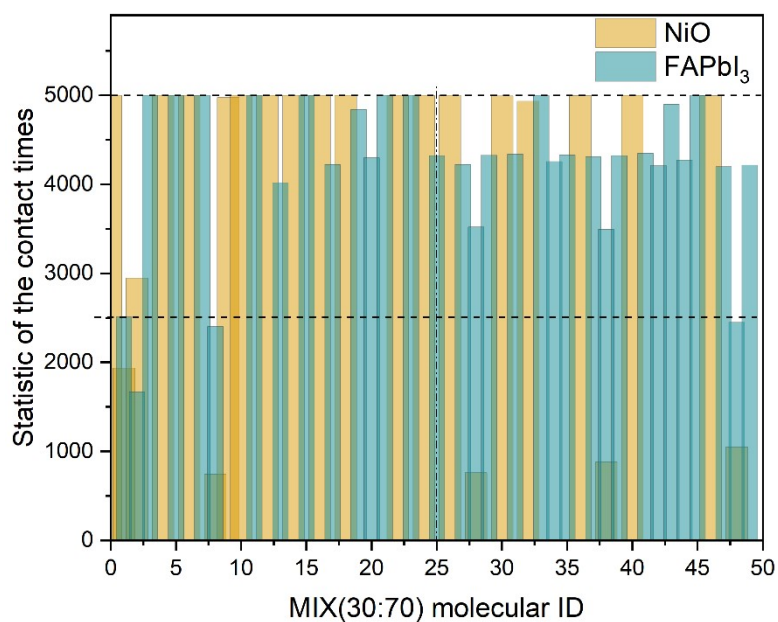

Fig. S6. The statistic of the contact times between MIX (30:70) and NiO, FAPbI<sub>3</sub>.

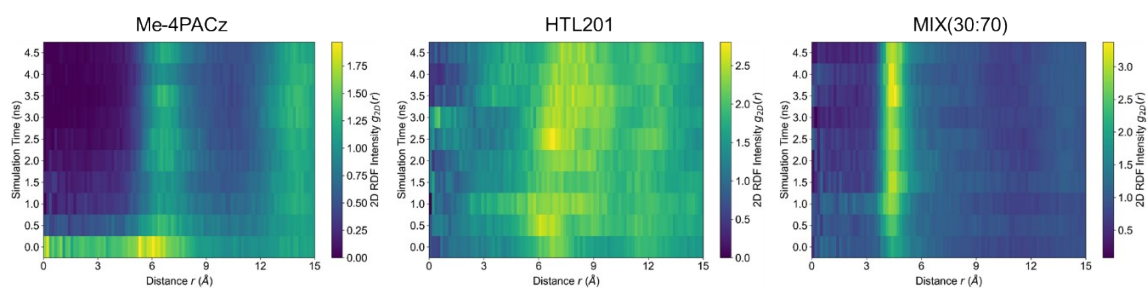

Fig. S7. RDF of the p-p atom pair during the 300 K 5ns production runs

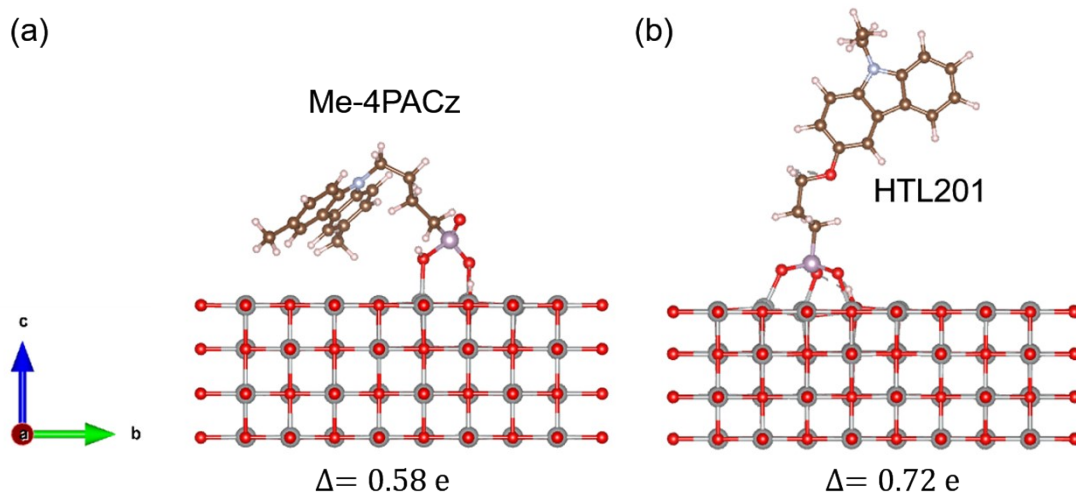

Fig. S8 Relaxed geometry of the Me-4PACz (a) and (HTL201) on NiO, the bade charge transfer is calculated.
